# Supplementary material for: A Pilot Study Using Next-Generation Sequencing in Advanced Cancers: Feasibility and Challenges
Source: PLoS One. 2013 Oct 30;8(10):e76438. doi: 10.1371/journal.pone.0076438 (PMC3813699; doi:10.1371/journal.pone.0076438)
Supplement: Table S1 [file pone.0076438.s010.xlsx]

## Sheet: Sheet1
	Supplementary Table 1. WGS, exome, and WTS metrics	Patient 1	Patient 2	Patient 3	Patient 4	Patient 5	Patient 6	Patient 7	Patient 8	Patient 9	Patient 10	Patient 11	Normal lung	Normal human pancreas	Pooled normal lymph node	Pooled normal skin	Normal ureter RNA	Normal kidney
WGS metrics		Metastatic liposarcoma	Metastatic neversmoker lung adenocarcinoma	Metastatic adenocarcinoma of pancreas	Metastatic olfactory neuroblastoma	Metastatic thymic carcinoma	Metastatic sertoli cell carcinoma	Metastatic basal cell carcinoma of the skin	Metastatic transitional cell urothelial cancer	Advanced adenosquamous pancreas cancer	Metastatic papillary renal cell carcinoma	Metastatic bronchial neuroendocrine cancer
	Total amount of data generated (GB)	-	384.922	420.94	468.08	-	366.014	275.562	520.37	428.102	350.956	262.803	-	-	-	-	-	-
	Q30 data generated (GB)	-	268.1	339.9	379.7	-	296.4	196.5	363.3	358.3	274.8	207.4	-	-	-	-	-	-
	Average %Q30	-	70.9	81.3	81.3	-	81.1	70.8	70	84.4	79.1	78.9	-	-	-	-	-	-
	Total number of PF reads	-	1858.68	2029.61	2265.19	-	3041.51	1644.64	2808.59	2504.76	1919.56	1346.73	-	-	-	-	-	-
	Total number of reads	-	1247399129	2878046795	2939014734	-	3041513515	1296688687	3528925780	1754672056	1561168734	1361149686	-	-	-	-	-	-
	Aligned Reads - Normal	-	640546353	1271057635	2111405684	-	1384872079	667471529	1656250357	869898435	705790977	609156236	-	-	-	-	-	-
	Aligned Reads - Tumor	-	606852776	1606989160	2018876071	-	1628450845	533554809	1526492960	594298376	763429901	678389891	-	-	-	-	-	-
	Average coverage depth - Normal	-	21.5359	42.7344	70.9879	-	47.0857	22.4412	54.62	28.6	23.7616	20.5083	-	-	-	-	-	-
	Average coverage depth - Tumor	-	20.4031	54.0288	67.8769	-	55.3673	17.9387	45.86	19.87	25.7021	22.8391	-	-	-	-	-	-
Exome metrics
	Total amount of data generated (GB)	-	N/A	N/A	N/A	-	26.7	13.3	35.1	N/A	27.6	29.2	-	-	-	-	-	-
	Q30 data generated (GB)	-	N/A	N/A	N/A	-	22	11.1	29.2	N/A	24.8	23.1	-	-	-	-	-	-
	Total number of reads	-	N/A	N/A	N/A	-	218296470	111678257	392629942	N/A	224890888	301471184	-	-	-	-	-	-
	Aligned Reads - Normal	-	N/A	N/A	N/A	-	89667275	49644639	123124275	N/A	168269051	149798936	-	-	-	-	-	-
	Aligned Reads - Tumor		N/A	N/A	N/A	-	128629195	62033618	260637125	N/A	152581663	143945852	-	-	-	-	-	-
	Mean target coverage depth - Normal	-	N/A	N/A	N/A	-	97.44	22.44	89.9414	N/A	140.29	148.76	-	-	-	-	-	-
	Mean target coverage depth - Tumor		N/A	N/A	N/A	-	140.08	17.94	217.959	N/A	111.53	167.04	-	-	-	-	-	-
	Germline SNPs called	-	3402364	3610297	2173398	-	3518669	3262829	3626113	3280556	4502272	4858283	-	-	-	-	-	-
	Transition/Transversion Ratio	-	2.02	2.0133	2.14	-	1.87	1.8416	1.87	1.87	1.99	1.97	-	-	-	-	-	-
	dbSNP 129 rate (1)	-	88.26	87.29	87.38	-	88.08	89.57	88.45	89.44	88.38	86	-	-	-	-	-	-
	Non-synonymous germline variants	-	10058	12830	10307	-	10097	21798	26163	10118	11929	13052	-	-	-	-	-	-
	Somatic SNVs called (strict lists)	-	4134	25	58	-	30	860	130	123	379	4	-	-	-	-	-	-
WTS metrics
	Total amount of data generated (GB)	-	22.4	25.7	N/A	-	N/A	23.1*	28.8**	23	40.0***	29.49	24.8	14.84	23.1*	23.1*	28.8**	40.0***
	Q30 data generated (GB)	-	18.4	21.1	N/A	-	N/A	18.9*	23.1**	16.8	32.1***	22.5	20.4	12.2	18.9*	18.9*	23.1**	32.1***
	%Q30 (overall %Q30 shown if pooled)	-	80.9	80.7	N/A	-	N/A	81.7*	80.2**	72.9	81.1***	76.3	80.1	1063	81.7*	81.7*	80.2**	81.1***
	Total number of PF reads (M)	-	102.66	108.49	N/A	-	N/A	111.0*	158.0**	127.09	215.4***	156.14	121.8	533.63	111.0*	111.0*	158.0**	215.4***
	Total number of reads	-	97220216	247382440	N/A	-	N/A	49620964	100307686	254189634	206909902	305736338	243600696	377376444	59661866	106326974	202931030	169527654
	Total number of PF bases		7194295984	7747334984	N/A	-	N/A	3043095675	6029244494	12919255272	15349362284	23282364662	9567256722	7273515944	3643411200	6160559625	11201063601	16707065490
	Total number of PF mRNA bases	-	305967875	309409900	N/A	-	N/A	129848883	244287090	472290880	4865128222	10236423094	438362025	319546652	155264390	251180184	427683574	10899968739
	*Patient 7 RNA pooled with normal lymph node & normal skin libraries
	**Patient 8 RNA pooled with normal ureter library
	***Patient 10 RNA pooled with normal kidney library
	‘PF’ stands for ‘pass filter’ and refers to the total number of reads that are of high quality (this value is separate from the Q30 score) as analyzed by Illumina HiSeq software.
	(1)-refers to the percentage of SNPs identified that are listed in NCBI’s public dbSNP database (build 129), which archives short genetic variations.

## Sheet: Sheet2
	Patient 2 (01-02)	Patient 7 (01-07)	Patient 8 (01-08)	Patient 9 (01-09)	Patient 10 (01-11)	Patient 11 (01-12)
	Metastatic neversmoker lung adenocarcinoma	Metastatic basal cell carcinoma of the skin	Metastatic transitional cell urothelial cancer	Advanced adenosquamous pancreas cancer	Metastatic papillary renal cell carcinoma	Metastatic bronchial neuroendocrine cancer	Normal lung	Pooled normal lymph node	Pooled normal skin	Normal ureter RNA	Normal kidney
Total number of reads
Total mapped reads

## Sheet: Sheet3
	01-06	01-11	01-12
	Patient 6 (01-06)	Patient 10 (01-11)	Patient 11 (01-12)
	Metastatic sertoli cell carcinoma	Metastatic papillary renal cell carcinoma	Metastatic bronchial neuroendocrine cancer
Variant Analysis	BWA	BWA	BWA
Germline SNPs called
Transition/Transversion Ratio
dbSNP 129 rate
Non-synonymous germline variants
Somatic SNVs called (strict lists)	29
Somatic indels called (CODING and UTR)	8
